# Supplementary material
Source: Elsevier journal article supplement (https://rcastoragev2.blob.core.windows.net/f126364f0cd18e90b0f172f6cee30984/mmc1.pdf)
Supplement: mmc1 [file mmc1.pdf]

## Supplementary webappendix

This webappendix formed part of the original submission and has been peer reviewed. We post it as supplied by the authors.

Supplement to: Shallcross LJ, Fragaszy E, Johnson AM, Hayward AC. The role of the Panton-Valentine leucocidin toxin in staphylococcal disease: a systematic review and meta-analysis. *Lancet Infect Dis* 2012; published online Oct 26. [http://dx.doi.org/10.1016/S1473-3099\(12\)70238-4](http://dx.doi.org/10.1016/S1473-3099(12)70238-4).

## Web appendix

### Results

#### Pneumonia

Studies of pneumonia either prospectively investigated the role of PVL in a cohort of hospitalised patients or assessed the prevalence of PVL genes amongst heterogeneous isolates obtained from a hospital laboratory or reference unit. 11/12 studies reported the prevalence of PVL-positive strains amongst *S. aureus* pneumonia, two of which only enrolled children. The remaining study was a large case series.<sup>1</sup> Only three studies included more than 50 isolates in the analysis. The prevalence of PVL genes varied greatly in the eight studies of mainly adults with pneumonia, representing major regional differences in molecular epidemiology and heterogeneous study designs. In a study from Singapore only 0.3% of hospitalised patients with staphylococcal pneumonia were infected with PVL producing strains compared to 67% of specimens from community-onset infections referred to the French staphylococcal reference unit. Reference units receive highly biased samples from predominantly severe or unusual infections, whereas most included studies analysed samples submitted to the laboratory for routine diagnostic purposes, representing a spectrum of disease severity. However, even in hospital-based studies there was wide regional variation in the proportion of PVL-positive strains. Most studies used different inclusion criteria and without data on the proportion of infections that originated in the community and hospital settings, it is difficult to make comparisons between different studies. The two paediatric studies from China and America respectively reported 40% and 96% of MRSA pneumonias to contain the PVL genes, and almost all (92%) of the isolates in the American study were USA300.<sup>2,3</sup> Given that PVL-positive USA300 is endemic in the United States,<sup>4</sup> it is difficult to assess the role of PVL in these two studies independent of bacterial strain.

There were two studies of unselected *S. aureus* isolates from New Zealand and Singapore, both of which reported a negative association between PVL-positive strains and pneumonia compared to individuals with skin and soft tissue disease, although both these studies were small and did not reach statistical significance.<sup>5,6</sup> USA300 was the predominant clone in both studies from the United States, but outside of North America this strain was rare (3/3 studies).

#### Musculoskeletal infection

12 studies reported the prevalence of PVL-positive strains amongst *S. aureus* musculoskeletal infections. Six studies prospectively enrolled patients who were hospitalised or attending hospital with musculoskeletal disease,<sup>7-12</sup> three studies were from reference units,<sup>13-15</sup> and the remainder analysed isolates obtained from hospital microbiology laboratories.<sup>5,16-18</sup> Only three studies reported the prevalence of PVL genes amongst more than 50 isolates, reflecting the relative rarity of *S. aureus* musculoskeletal infection. In children PVL strains were highly prevalent (>70%) in three out of four studies of community onset infection, except in a study from the United States where PVL strains were less common amongst MRSA isolates (6/25) compared to MSSA strains (27/31).<sup>17</sup> The high prevalence was reported amongst both USA300 MRSA isolates in the United States,<sup>8,16</sup> and non-USA300 *S. aureus* isolates in a Tunisian study.<sup>7</sup> These four studies recruited a relatively homogeneous population of children with musculoskeletal infections, so differences in the proportion of MRSA strains producing PVL may be explained by geographical differences in molecular epidemiology or by different time periods, as the study reporting a comparatively low PVL gene prevalence was conducted before 2002. In adults the prevalence of PVL genes amongst *S. aureus* musculoskeletal disease ranged from 9-80%, in part explained by geographical differences in molecular epidemiology. Each of the four studies of adults attending or admitted to hospital were conducted in different continents,<sup>9-12</sup> and only one of these studies specified whether infection was community or hospital-acquired,<sup>12</sup> making it difficult to directly compare these studies. Estimates of PVL gene prevalence were similarly disparate (9-46%) from the four laboratory or reference unit based studies which all employed different inclusion criteria and study designs.<sup>5,13,14,18</sup>

In the single study of unselected isolates musculoskeletal infections caused by MSSA were less likely to be associated with PVL compared to skin and soft tissue disease (OR 0.48, 95% CI: 0.15-1.62).<sup>5</sup> Outside of the United States ST8 / USA300 was rare except in one study from the Finnish reference unit (30% USA300 variant).<sup>13</sup>

#### Bacteraemias

All 19 studies of bacteraemias sourced isolates from hospital laboratories or European reference units. Studies ranged in size from 65 to 474 isolates. European studies were mainly conducted at national or regional reference

units (four studies) or were hospital based (four studies). Although studies based at reference units are inherently biased because severe and unusual infections are over-represented we found good correlation between all European studies of bacteraemias with one exception. All studies reported a low (<2.5%) prevalence of PVL genes amongst *S. aureus* bacteraemias, except for a Spanish study where one third of MSSA strains produced PVL.<sup>19</sup> The Spanish study used a different sampling strategy collecting isolates from 21 hospitals, but it is unclear if specimens were systematically different to European reference unit or hospital based studies in terms of disease severity or the proportion defined as community-onset infection. Two studies from the United States investigated the relationship between PVL and infection-onset reporting high prevalence (>80%) of PVL genes amongst community-associated MRSA bacteraemias and lower prevalence (<30%) amongst healthcare-associated MRSA, almost entirely associated with USA300.<sup>20,21</sup> A further American study reported much lower prevalence (<20%) of PVL genes in both MRSA and MSSA strains, but did not specify whether infections were community or hospital-onset making it difficult to compare the estimates from this study. In three reports from Taiwan approximately one-third of community-acquired MRSA strains,<sup>22,23</sup> and 16% of healthcare-associated strains produced PVL.<sup>24</sup> The prevalence of PVL genes amongst *S. aureus* varied widely between the three remaining studies from Korea (0%), Australia (15%) and India (39%),<sup>12,25,26</sup> reflecting major geographical differences in molecular epidemiology and heterogeneous study designs.

### Skin and soft tissue infections

Studies of skin and soft tissue infections either reported the prevalence of PVL genes amongst patients attending hospital (15 studies) or were laboratory-based investigating isolates from hospitals (21) or reference units (3 studies). One study was based in the community. 40 studies reported the prevalence of PVL strains amongst *S. aureus* skin and soft tissue infections in Europe (16), USA (10), Australia (7), Asia (5), Africa (2) and one global study. The prevalence of PVL genes amongst *S. aureus* skin and soft tissue infections in the European studies was heterogeneous ranging from <1% to >90%. This represents major differences in study design, inclusion criteria and sampling frame employed by these studies, precluding any attempt at an aggregate estimate of the association between PVL genes and skin and soft tissue infection by region. In five out of eight European studies of patients with comparatively severe skin and soft tissue disease attending or admitted to hospital, more than 70% of *S. aureus* specimens produced PVL.<sup>27-31</sup> Three of these studies only recruited patients with abscesses or furuncles,<sup>27,28,30</sup> and one study enrolled patients undergoing surgical drainage of SSTI.<sup>29</sup> The remaining three studies reported a lower PVL gene prevalence (12-21%) primarily amongst patients attending outpatient clinic with milder infections. In eight European studies based at hospital-laboratories and reference units the prevalence of PVL genes amongst *S. aureus* ranged from 21-51%, with the exception of a single cross-sectional study from France which reported less than 1% PVL gene prevalence amongst MRSA strains. This study included samples submitted to community laboratories which are likely to be derived from comparatively mild infections in comparison to specimens from more severe infections submitted to reference units and hospital laboratories. ST8 clones were identified in three out of seven studies and accounted for 13-33% of PVL strains from Germany,<sup>32,33</sup> and 33% of MRSA strains from France,<sup>18</sup> although typing was only conducted on a small number of isolates. This reflects the relative rarity of USA300/ST8 clones in Europe.<sup>34</sup>

In four studies of patients admitted to or attending hospital with skin and soft tissue infection in the United States more than 90% of *S. aureus* specimens produced PVL.<sup>4,35-37</sup> These studies were relatively homogeneous focusing on patients with acute purulent skin and soft tissue infections requiring surgery,<sup>35,36</sup> or attending the Emergency department.<sup>4,37</sup> More than 94% of MRSA isolates were classified as ST8/USA300 in the three studies where molecular typing was performed.<sup>4,35,37</sup> The prevalence of PVL genes was more variable amongst MRSA strains in the six laboratory-based studies from the United States, mainly due to differences in study design and inclusion criteria. Four out of six studies specified either community acquired or community onset infections, with PVL gene prevalence ranging from 33% (CO-MRSA) to 70-92% for CA-MRSA.<sup>38-41</sup> Of the two remaining studies, one was a clinical trial reporting a high prevalence (85%) of PVL-positive MRSA amongst SSTI isolates derived from an unspecified source, highly correlated with USA300.<sup>42</sup> The other study reported a relatively low (23%) prevalence of PVL genes amongst MRSA strains in a New York study of patients with skin and soft tissue infections.<sup>43</sup> Neither of these studies classified infection as community or hospital-onset making it difficult to draw comparisons with other studies.

Six studies were conducted in Australia, five of which were laboratory based studies of non-multiply resistant MRSA strains that were typically community-acquired,<sup>44,45</sup> or community-onset.<sup>46-48</sup> These studies used similar inclusion criteria with four out of five studies reporting high PVL gene prevalence (>80%). The fourth study based in Darwin reported 57% of MRSA strains to produce PVL. Compared to the other studies, a high

proportion of patients accessing Darwin hospital are indigenous Australians, so it is feasible that population differences underlie the variation in estimates of PVL gene prevalence. The remaining study investigated patients in the community with pyoderma reporting a relatively low prevalence of PVL genes (8%). PVL positive strains were rarely ST8/USA300.<sup>44,46</sup>

The five Asian studies from five different countries reported PVL prevalence ranging from 17-81%.<sup>6,11,49-51</sup> Geographical differences in molecular epidemiology and variation in study design and inclusion criteria make it difficult to draw comparisons between these estimates, particularly as the majority of studies did not distinguish between community and hospital onset infections. Two studies were conducted in Africa, one in Tunisia based at a single hospital (PVL gene prevalence 21%) and a further study which included samples from five African countries (PVL gene prevalence 56%). USA300/ST8 was rare amongst PVL strains in Asia and Africa, although data on bacterial strain was limited.

Odds ratios comparing skin and soft tissue infections to all other infection types could be calculated in ten European studies, nine of which demonstrated a clear association between PVL and skin and soft tissue disease. The strength of association was highly variable and mainly dependent on the comparator population. Four studies comparing skin and soft tissue isolates to diverse clinical specimens submitted to the hospital laboratory reported the odds of infection with a PVL-positive strain to be three to five times greater in patients with skin and soft tissue disease compared to all other manifestations of *S. aureus*.<sup>18,52-54</sup> By contrast the odds of infection with a PVL-positive strain were twenty times greater in those with skin and soft tissue infection when the comparator group was bacteraemias,<sup>55</sup> because PVL genes are rare amongst bacteraemias in Europe, see Table 3. Abscesses and furuncles were strongly associated with PVL in all included European studies (OR range: 17-140) with the strength of association largely dependent on the study design and comparator population.<sup>13,14,27,55,56</sup> Odds ratios could only be calculated for two studies from the USA which found the odds of PVL-positive infection to be seven times greater in abscesses compared to other types of skin and soft tissue infections,<sup>41</sup> and in skin and soft tissue infections compared to bloodstream infections.<sup>43</sup> PVL strains are not rare amongst bacteraemias in the United States, so using bacteraemias as the comparator group has less impact, highlighting the importance of geographical differences in molecular epidemiology. Two studies from New Zealand and Australia reported an association between skin and soft tissue infections and PVL genes, although the magnitude of the association varied (range 6.8-10.0), partly due to different study designs and comparator populations.<sup>5,48</sup> A further study suggested that the odds of PVL-positive infection were double in patients with skin and soft tissue infections, although failed to reach statistical significance.<sup>47</sup> Two Australian studies compared furuncles and abscesses respectively to other types of *S. aureus* skin infection reporting a strong association between PVL and furuncles (OR 40.0, 95% CI: 9.5-167.8), and abscesses (OR 12.1, 95% CI: 7.1-20.7).<sup>46,47</sup> Odds ratios could be calculated for four out of five studies from Asia which reported the odds of PVL-positive infection to be between four and eight times greater in patients with skin and soft tissue infection compared to other types of *S. aureus* infection.<sup>6,11,49,50</sup> These studies were all based at a single hospital and compared skin and soft tissue specimens to diverse clinical isolates submitted to the same laboratory. Only one study from Hong Kong classified infections as community or hospital-onset. Conversely both African studies failed to find an association between PVL and skin infections, which may be explained by differences in the proportion of infections sampled in Africa.<sup>9</sup> Three Asian or African studies included data on abscesses and/or furuncles all of which reported a strong but variable association with PVL (OR range 7.2-17.4) when compared to other manifestations of *S. aureus* disease.<sup>6,11,57</sup>

Overall eight studies included unselected *S. aureus* isolates, including samples from primary care. Five of these studies included sufficient information to calculate odds ratios comparing skin infections to all other types of *S. aureus* infection. In four out of five of these studies there was a clear association between PVL and skin and soft tissue infections when compared to all other types of *S. aureus* infection, (OR range: 3.4-6.8).<sup>5,6,53,54</sup>

## Colonisation

There were five studies from Europe, two from the United States, two from Australia and New Zealand, eleven from Asia, and one from Africa. In Europe the prevalence of PVL genes in nasal specimens from healthy adults and children was low (<1%) in four studies,<sup>30,58-60</sup> whereas in a single study from Greece 8.2% of children were colonised with PVL-positive *S. aureus*.<sup>31</sup> This is consistent with previous research suggesting PVL-positive infections are relatively common in Greece compared to most of Europe.<sup>61</sup> In the United States National Health and Nutrition Examination Survey (NHANES) PVL genes were more frequently identified in MRSA (6/75) than MSSA isolates (3/297).<sup>62</sup> By contrast in a study of healthy children 16% of *S. aureus* specimens produced PVL.<sup>63</sup> Regional differences in molecular epidemiology or sampling over different time periods are possible explanations for this disparity. The remaining 13 studies were conducted in Australia, New Zealand, Taiwan (four studies), Indonesia, Malaysia, Korea and Gabon. The prevalence of PVL genes varied widely between and

within countries which may be partly explained by differences in the proportion of patients with healthcare contact, different populations and indigenous communities, regional variation in molecular epidemiology and varying study designs. Most studies reported the prevalence of PVL genes amongst MSSA strains with the exception of two studies in Taiwanese children, where PVL genes were present in approximately one third of MRSA colonising strains.<sup>64,65</sup>

## **Discussion**

We have compared the proportion of *S. aureus* pneumonia, bacteraemias, musculoskeletal infections and colonisation associated with strains carrying PVL genes to skin and soft tissue disease to assess the relationship between PVL, colonisation, disease and outcome and acknowledge that without population-based studies it is impossible to know what absolute proportion of PVL-positive specimens are associated with colonisation and mild, moderate and invasive disease. We used meta-analysis to combine studies which were heterogeneous in terms of study design and acknowledge that this will have introduced bias into the summary estimates we derived, despite sensitivity analyses. Skin and soft tissue infections were chosen as the largest and most homogenous comparator group for all epidemiological analyses, but as each study used different or unstated inclusion criteria and often used different sampling frames for disease and skin and soft tissue isolates, it is difficult to assess the impact of bias on our estimates. In particular the proportion of infections classified as community and hospital-onset may have differed between disease and comparator skin and soft tissue infections, introducing selection bias with regard to community versus hospital-onset of disease. We excluded studies from meta-analysis where disease and comparator isolates were sampled differently, and compared our summary estimates to the subset of samples that had directly compared community-onset infections to community-onset skin and soft tissue disease to try and assess the impact of selection bias.

Laboratory sampling is biased towards more severe cases and this is likely to be most acute for skin and soft tissue infections, which are common, strongly associated with PVL, and are rarely sampled and sent for microbiological testing because most infections are mild.

**Table 1. Studies reporting prevalence of PVL genes in *S. aureus* (SA) pneumonia**

| Author                     | Location        | Year    | Study setting               | Inclusion criteria and provenance of pneumonia isolates                                                              | Prevalence of PVL genes (%) amongst <i>S. aureus</i> <sup>1</sup> isolates, healthcare-associated (HA), community-associated (CA) or community-onset (CO) | Comparator population of skin and soft tissue infections (SSTI)                                        | Odds of infection with PVL-positive strain comparing pneumonia to skin & soft tissue infection OR (95% CI) <sup>2</sup> | Proportion of PVL strains identified as ST8 / USA300 (%) |
|----------------------------|-----------------|---------|-----------------------------|----------------------------------------------------------------------------------------------------------------------|-----------------------------------------------------------------------------------------------------------------------------------------------------------|--------------------------------------------------------------------------------------------------------|-------------------------------------------------------------------------------------------------------------------------|----------------------------------------------------------|
| <b>Studies in children</b> |                 |         |                             |                                                                                                                      |                                                                                                                                                           |                                                                                                        |                                                                                                                         |                                                          |
| Carillo-Marquez (3)        | USA             | 2001-09 | Texas hospital              | Children admitted to hospital with SA pneumonia. 79% community-acquired pneumonia.                                   | 79/82 (96.3) MRSA; 26/28 (92.3) MSSA                                                                                                                      | No comparator                                                                                          | No comparator data                                                                                                      | 75/82 (92) USA300 MRSA; 14/28 (50) USA300 MSSA           |
| Geng (2)                   | China           | 2006-08 | 8 regional hospitals        | Hospitalised children with community-acquired pneumonia.                                                             | 22/55 (40.0) CA-MRSA                                                                                                                                      | No comparator                                                                                          | No comparator data                                                                                                      | N/A <sup>3</sup>                                         |
| <b>Studies in adults</b>   |                 |         |                             |                                                                                                                      |                                                                                                                                                           |                                                                                                        |                                                                                                                         |                                                          |
| Badiou (18)                | France          |         | Lyon hospital               | Patients with SA pneumonia in Lyon. Infection onset not specified.                                                   | 6/18 (33.3) SA                                                                                                                                            | 144 pus samples from 6 countries.                                                                      | 0.63 (0.22-1.76)                                                                                                        | 0                                                        |
| Holmes (56)                | England & Wales | 2002-03 | Reference unit              | SA pneumonia specimens submitted to the reference unit. Infection onset not specified.                               | 4/37 (10.9) SA                                                                                                                                            | 63 skin and soft tissue isolates submitted to reference unit.                                          | 0.39 (0.12-1.27)                                                                                                        | 0                                                        |
| Hsu* (6)                   | Singapore       | 2004    | Singapore Hospital          | Specimens submitted to hospital laboratory from adults with SA pneumonia. Community or hospital onset not specified. | 1/30 (0.3) SA                                                                                                                                             | 95 specimens from adults with SSTI submitted to hospital laboratory contemporaneously.                 | 0.17 (0.02-1.34)                                                                                                        | N/A                                                      |
| Johnsson (52)              | Sweden          | 1999-02 | Orebro Hospital             | SA isolates from patients in a prospective study of pneumonia aetiology. Community or hospital onset not specified.  | 2/23 (8.7) SA                                                                                                                                             | 43 specimens from patients attending hospital with SSTI. 73 isolates from severe or unusual SSTI's.    | 0.55 (0.12-2.58)                                                                                                        | N/A                                                      |
| Lina (14)                  | France          | 1985-98 | Reference unit              | Pneumonia specimens submitted to reference unit. 68% community-acquired infection.                                   | 23/40 (57.5) SA; 0/13(0) HA-SA 27/40 (67.5) CA-SA                                                                                                         | 74 reference unit specimens from pyogenic infections. Onset of infection not stated.                   | 1.28 (0.59-2.78)                                                                                                        | N/A                                                      |
| Muttaiyah* (5)             | New Zealand     |         | Auckland hospital           | Pneumonia specimens submitted to hospital laboratory. Community or hospital onset not specified.                     | 2/11 (18.2) MSSA                                                                                                                                          | 234 SSTI specimens submitted to hospital laboratory contemporaneously.                                 | 0.24 (0.05-1.14)                                                                                                        | N/A                                                      |
| Nickerson (11)             | Thailand        | 2006-07 | Sappasithiprasong hospital  | Patients attending hospital with <i>S. aureus</i> pneumonia. Community or hospital onset not specified.              | 5/11 (45.5) SA                                                                                                                                            | Specimens from patients attending hospital contemporaneously with SSTI.                                | 0.44 (0.13-1.50)                                                                                                        | N/A                                                      |
| Peyrani (66)               | USA             | 2008-10 | 4 hospitals                 | Isolates from patients with hospital-acquired or ventilator-assisted pneumonia                                       | 29/109 (26.6) HA-MRSA                                                                                                                                     | No comparator                                                                                          | No comparator data                                                                                                      | 29/29 (100) USA300                                       |
| Wehrhahn (12)              | Australia       |         | Perth & Fremantle hospitals | Hospitalised patients with community-onset pneumonia.                                                                | 5/22 (22.7) CO-SA                                                                                                                                         | 49 specimens from patients admitted with community-onset abscess, cellulitis or necrotising fasciitis. | 0.26 (0.08-0.82) <sup>4</sup>                                                                                           | ST8-MRSA-IV less than 5% <sup>5</sup>                    |

\*Study of unselected isolates which included all *S. aureus* specimens submitted to laboratory

<sup>1</sup> Prevalence of PVL-positive strains amongst *S. aureus* (SA), meticillin-resistant (MRSA) or meticillin-sensitive strains (MSSA)

<sup>2</sup> Odds ratio and 95% confidence interval

<sup>3</sup> Not applicable

<sup>4</sup> Less than 50 isolates of comparator skin and soft tissue infections. Skin and soft tissue data used to calculate odds ratios but excluded from tables 4 and 5

<sup>5</sup> For entire study, data unavailable for pneumonia isolates alone

**Table 2. Studies reporting the role of PVL genes in staphylococcal musculoskeletal infections (MSI)**

| Author                | Location    | Year    | Study setting                | Inclusion criteria and provenance of samples                                                                     | Prevalence of PVL genes (%) amongst healthcare-associated (HA), community-associated (CA) or community-onset (CO) <i>S. aureus</i> <sup>1</sup> | Comparator population of skin and soft tissue infections (SSTI)               | Odds of infection with PVL-positive SSTI, OR (95% CI) <sup>2</sup> | Proportion of PVL strains identified as ST8/USA300 (%) |
|-----------------------|-------------|---------|------------------------------|------------------------------------------------------------------------------------------------------------------|-------------------------------------------------------------------------------------------------------------------------------------------------|-------------------------------------------------------------------------------|--------------------------------------------------------------------|--------------------------------------------------------|
| Abdel-Haq (8)         | USA         | 2006-07 | Michigan hospital            | Hospitalised children with community-onset bone and joint infections.                                            | 20/22 (90.9) CO-MRSA                                                                                                                            | 43 specimens from hospitalised children with SSTI. 98% community-onset.       | 0.49 (0.06-3.72) <sup>3</sup>                                      | 20/20 (100) USA300 MRSA                                |
| Badiou (18)           | France      |         | Lyon hospital                | Patients with SA bone and joint infections in Lyon. Community or hospital onset not specified.                   | 2/23 (8.7) SA                                                                                                                                   | 144 pus samples from 6 countries.                                             | 0.12 (0.03-0.53)                                                   | 0                                                      |
| Breurec (9)           | Africa      | 2007-08 | Dakar                        | Patients hospitalised with myositis or osteomyelitis. Community or hospital onset not specified.                 | 31/36 (86.1) MSSA                                                                                                                               | 119 specimens from hospitalised patients with SSTI.                           | 2.37 (0.76-7.42) <sup>3</sup>                                      | Less than 5% ST8 <sup>4</sup>                          |
| Dailiana (10)         | Greece      | 2003-06 | Thessalia hospital           | Patients with MSI attending hospital. 85% community-onset.                                                       | 58/81 (71.6) MRSA                                                                                                                               | No comparator                                                                 | No data                                                            | 0                                                      |
| Kanerva (13)          | Finland     | 2004-06 | Reference unit               | Isolates from patients with bursitis or arthritis submitted to reference unit and defined as community-acquired. | 5/11 (45.5) CA-MRSA                                                                                                                             | SSTI specimens submitted to reference unit defined as community-acquired.     | 0.97 (0.28-3.32)                                                   | 33/90 (37%) ST8 MRSA-IV <sup>9</sup>                   |
| Kechrid (7)           | Tunisia     | 2006-08 | Tunis hospital               | Children attending hospital with community-acquired osteomyelitis.                                               | 11/12 (91.7) CA- SA                                                                                                                             | No comparator                                                                 | No data                                                            | 0                                                      |
| Lina (14)             | France      | 1985-98 | Reference unit               | Osteomyelitis specimens submitted to reference unit. Community or hospital onset not specified.                  | 3/13 (23.1) SA                                                                                                                                  | 74 specimens from pyogenic infections submitted to reference unit.            | 0.28 (0.07-1.12)                                                   | N/A <sup>5</sup>                                       |
| Martinez-aguilar (17) | USA         | 2000-02 | Texas hospital               | Children with community-acquired MSI.                                                                            | 6/25 (24.0) CA-MRSA<br>27/31 (87.1) CA-MSSA                                                                                                     | No comparator                                                                 | No data                                                            | N/A                                                    |
| Muttaiah* (5)         | New Zealand | 2008    | Auckland hospital            | Specimens from bone or joint infections submitted to hospital laboratory. Infection onset not specified.         | 4/13 (30.8) MSSA                                                                                                                                | 234 SSTI specimens submitted to hospital laboratory contemporaneously.        | 0.48 (0.15-1.62)                                                   | N/A                                                    |
| Nickerson (11)        | Thailand    | 2006-07 | Sappasithip ra-song hospital | Patients attending hospital with bone or joint infection. Community or hospital onset not specified.             | 12/25 (48.0) SA                                                                                                                                 | Specimens from patients attending hospital with abscess or SSTI.              | 0.49 (0.21-1.14)                                                   | N/A                                                    |
| Pannaraj (16)         | USA         | 2000-05 | Texas hospital               | Children hospitalised with community-acquired pyomyositis or myositis.                                           | 17/24 (70.8) CA-SA                                                                                                                              | No comparator                                                                 | No data                                                            | 13/13(100) USA300 MRSA; 1/9 (11) USA300 MSSA           |
| Wehrhahn (12)         | Australia   |         | Perth & Fremantle hospitals  | Consecutive hospitalised patients with community-onset invasive bone or joint infection.                         | 14/76 (18.4) CO-SA                                                                                                                              | 49 specimens of community-onset abscess, cellulitis or necrotising fasciitis. | 0.20 (0.09-0.45) <sup>8</sup>                                      | ST8-MRSA-IV less than 5% <sup>9</sup>                  |

\*Study of unselected isolates which included all *S. aureus* specimens submitted to laboratory

<sup>1</sup> Prevalence of PVL-positive strains amongst *S. aureus* (SA), methicillin-resistant (MRSA) or methicillin-sensitive strains (MSSA)

<sup>2</sup> Odds ratio and 95% confidence interval

<sup>3</sup> Less than 50 isolates of comparator skin and soft tissue infections. Skin and soft tissue data used to calculate odds ratios but excluded from tables 4 and 5

<sup>4</sup> Refers to entire study, data unavailable for bone, joint and muscle infections alone

<sup>5</sup> Not applicable

**Table 3. Studies reporting the role of PVL genes amongst staphylococcal blood-stream infections (BSI)**

| Author           | Location        | Year    | Study setting                        | Inclusion criteria and provenance of BSI samples                                                                               | Prevalence of PVL genes (%) amongst healthcare-associated (HA), community-associated (CA) or community-onset (CO) <i>S. aureus</i> <sup>1</sup> | Comparator population of skin and soft tissue infections (SSTI) | Odds of infection with PVL-positive strain comparing BSI to SSTI, OR (95% CI) <sup>2</sup> | Proportion of PVL strains identified as ST8/USA300 (%) |
|------------------|-----------------|---------|--------------------------------------|--------------------------------------------------------------------------------------------------------------------------------|-------------------------------------------------------------------------------------------------------------------------------------------------|-----------------------------------------------------------------|--------------------------------------------------------------------------------------------|--------------------------------------------------------|
| Budimir          | Croatia         | 2001-02 | 10 hospitals in 7 cities             | Hospital-acquired BSI isolates collected as part of EARSS <sup>3</sup> .                                                       | 0/82 (0) HA- MRSA                                                                                                                               | No comparator                                                   | No comparator                                                                              | N/A                                                    |
| Chen (22)        | Taiwan          | 2001-07 | National Taiwan hospital             | Adults treated in the Emergency department with community-acquired MRSA SCCmec IV or V.                                        | 43/115 (37.4) CA-MRSA                                                                                                                           | No comparator                                                   | No comparator                                                                              | N/A                                                    |
| Chua (21)        | USA             | 2005-07 | Henry Ford hospital, Detroit         | MRSA isolates from adults patients submitted to hospital laboratory. 24% community-associated BSI.                             | 40/50 (80.0) CA-MRSA; 36/160 (22.5) HA-MRSA                                                                                                     | No comparator                                                   | No comparator                                                                              | 74/76 (97) USA300                                      |
| Couppie (55)     | France          |         | Strasbourg university hospital       | BSI specimens from patients attending hospital. Community or hospital onset not specified.                                     | 1/87 (1.1) SA                                                                                                                                   | 184 SSTI specimens from patients attending hospital.            | 0.04 (0.006-0.32)                                                                          | N/A                                                    |
| D'Souza (26)     | India           | 2006-9  | Mumbai hospital                      | BSI specimens from hospital and community patients in Mumbai.                                                                  | 20/51 (39.2) MRSA                                                                                                                               | No comparator                                                   | No comparator                                                                              | N/A                                                    |
| Ellington (67)   | UK & Ireland    | 2005    | Reference unit                       | Isolates from hospitalised patients with BSI from 25 centres. Community or hospital onset not specified.                       | 0/88 (0)MRSA                                                                                                                                    | No comparator                                                   | No PVL strains                                                                             | N/A                                                    |
| Holmes (56)      | England & Wales | 2002-03 | Reference unit                       | Specimens from patients with SA BSI submitted to the reference unit. Community or hospital onset not specified.                | 1/65 (1.6) MSSA                                                                                                                                 | 63 SSTI isolates submitted to reference unit.                   | 0.05 (0.006-0.39)                                                                          | 0                                                      |
| Huang (24)       | Taiwan          | 1999-05 | Taiwan university hospital           | Random selection of health-care associated MRSA isolates submitted to hospital laboratory from patients with BSI.              | 11/69 (16.0) HA-MRSA                                                                                                                            | No comparator                                                   | No comparator                                                                              | N/A                                                    |
| Johnsson (52)    | Sweden          | 1999-02 | Orebro University hospital           | Specimens from hospitalised patients with BSI submitted to the hospital laboratory. Community or hospital onset not specified. | 1/65 (1.6) SA                                                                                                                                   | 116 specimens from patients attending hospital with SSTI.       | 0.09 (0.01-0.70)                                                                           | N/A                                                    |
| Kaltsas (43)     | USA             |         | Montefiore Medical centre            | BSI specimens submitted to hospital laboratory. Community or hospital onset not specified.                                     | 2/45 (4.4) MSSA<br>9/54 (16.7) MRSA                                                                                                             | 101 specimens from SSTI submitted to laboratory.                | 0.11 (0.05-0.23)                                                                           | N/A                                                    |
| Mee-marquet (68) | France          | 2003    | Regional reference unit              | BSI specimens from patients attending 31 hospitals with BSI. 35% community-acquired BSI.                                       | 0/69 (0) SA                                                                                                                                     | No comparator                                                   | No PVL strains                                                                             | No PVL strains                                         |
| Melles (58)      | Netherlands     |         | University Medical Centre, Rotterdam | BSI isolates from patients in the Rotterdam area. Community or hospital onset not specified.                                   | 3/146 (2.1) MSSA                                                                                                                                | 18 SSTI specimens collected contemporaneously.                  | 0.03 (0.007-0.15) <sup>4</sup>                                                             | N/A                                                    |
| Peck (25)        | Korea           | 2006    | Samsung medical                      | BSI submitted to hospital laboratory.                                                                                          | 0/70 (0) SA                                                                                                                                     | No comparator                                                   | No PVL strains                                                                             | No PVL strains                                         |

<sup>1</sup> Prevalence of PVL-positive strains amongst *S. aureus* (SA), meticillin-resistant (MRSA) or meticillin-sensitive strains (MSSA)

<sup>2</sup> Odds ratio, 95% confidence interval

<sup>3</sup> European Antimicrobial Resistance Surveillance System

<sup>4</sup> Less than 50 isolates of comparator skin and soft tissue infections. Skin and soft tissue data used to calculate odds ratios but excluded from tables 4 and 5



|                    |           |         |                                  |                                                                                                                      |                                             |                                                                       |                                |                                       |
|--------------------|-----------|---------|----------------------------------|----------------------------------------------------------------------------------------------------------------------|---------------------------------------------|-----------------------------------------------------------------------|--------------------------------|---------------------------------------|
|                    |           |         | centre, Seoul                    | Community or hospital onset not specified.                                                                           |                                             |                                                                       |                                |                                       |
| Perez-Vazquez (19) | Spain     | 2006-7  | 21 hospitals                     | BSI specimens submitted to central laboratory. 33% community-onset BSI.                                              | 41/113 (36.3) MSSA;<br>1/90 (1.11) MRSA     | No comparator                                                         | No comparator                  | 1/42 ST8                              |
| Rossney (69)       | Ireland   | 2003    | 28 hospitals                     | BSI isolates submitted to reference unit from hospitals participating in EARSS. <sup>13</sup>                        | 2/474 (0.6%) MRSA                           | No comparator                                                         | No comparator                  | 0                                     |
| Seybold (20)       | USA       | 2004    | Grady memorial hospital, Atlanta | BSI specimens submitted to hospital laboratory. 58% community-onset BSI.                                             | 9/9 (100.0) CA-MRSA<br>30/107(28.0) HA-MRSA | No comparator                                                         | No comparator                  | USA300 (100%)                         |
| Von Eiff (70)      | Germany   | 1993-94 | Munster hospital                 | BSI specimens from hospitalised patients in 32 centres. Community or hospital onset not specified.                   | 2/219 (0.9) MRSA                            | No comparator                                                         | No comparator                  | N/A                                   |
| Wang (23)          | Taiwan    | 2002-05 | National Taiwan hospital         | Community-acquired BSI specimens from adults submitted to hospital laboratory, defined on antibiotic susceptibility. | 32/100 (32.0) CA-MRSA                       | No comparator                                                         | No comparator                  | N/A                                   |
| Wehrhahn (12)      | Australia |         | Perth & Fremantle hospitals      | Hospitalised patients with community-onset BSI.                                                                      | 10/66 (15.2) CO-SA                          | 49 specimens from hospital patients with community-onset severe SSTI. | 0.16 (0.07-0.38) <sup>14</sup> | ST8-MRSA-IV less than 5% <sup>1</sup> |

<sup>1</sup> Refers to entire study, data unavailable for BSI isolates alone

**Table 4. Studies assessing prevalence of PVL genes amongst skin and soft tissue infections (SSTIs)**

| Author           | Location        | Year    | Study setting                          | Inclusion criteria and provenance of samples                                                                                                                                    | Prevalence of PVL genes (%) amongst healthcare-associated (HA), community-associated (CA) or community-onset (CO) <i>S. aureus</i> <sup>1</sup> | Comparator population                                                                                                                                                           | Odds of infection with PVL-positive strain for SSTI versus comparator population, OR (95% CI) <sup>2</sup> | Proportion of PVL strains identified as ST8/USA300 (%) |
|------------------|-----------------|---------|----------------------------------------|---------------------------------------------------------------------------------------------------------------------------------------------------------------------------------|-------------------------------------------------------------------------------------------------------------------------------------------------|---------------------------------------------------------------------------------------------------------------------------------------------------------------------------------|------------------------------------------------------------------------------------------------------------|--------------------------------------------------------|
| Badiou (18)      | France          |         | Lyon hospital                          | Pus specimens from 6 countries. Community or hospital onset not specified.                                                                                                      | 64/144 (44.4) SA                                                                                                                                | 41 specimens from patients with SA pneumonia or bone and joint infection.                                                                                                       | 3.30 (1.43-7.64) <sup>3</sup>                                                                              | 8/24 (33) ST8 MRSA; 2/40 (5) ST8 MSSA                  |
| Couppie (55)     | France          |         | Strasbourg university hospital         | 1) Patients attending hospital with skin infections. Infection onset not specified.<br>2) Patients attending hospital with abscess or furuncle. Infection onset not specified.  | 39/184 (21.1) SA<br>36/126 (28.6) SA                                                                                                            | Specimens from 87 patients attending hospital with BSI.<br><br>Specimens from 134 patients attending hospital with SSTI and 87 patients with BSI excluding abscess or furuncle. | 23.13 (3.12-171.40)<br><br>139.5 (43.48-447.61)                                                            | N/A<br><br>N/A                                         |
| Del Giudice (28) | France          | 2003-08 | Frejus hospital                        | Patients attending hospital with skin abscesses. Community or hospital onset not specified.                                                                                     | 40/57 (70.2) SA                                                                                                                                 | No comparator.                                                                                                                                                                  |                                                                                                            | N/A                                                    |
| Del Giudice (27) | France          | 2003-10 | Frejus hospital                        | Patients attending hospital with abscess or furuncle. Infection onset not specified.                                                                                            | 72/80 (90.0) SA                                                                                                                                 | Patients attending hospital with SSTI excluding abscess or furuncle.                                                                                                            | 44.64 (19.13-104.18)                                                                                       | N/A                                                    |
| Holmes (56)      | England & Wales | 2002-03 | Reference unit                         | 1) SSTI isolates submitted to the reference unit. Infection onset not specified.<br>2) Specimens from abscesses submitted to the reference unit. Infection onset not specified. | 15/63 (23.8) SA<br>7/16 (43.8) SA                                                                                                               | 407 diverse clinical isolates submitted to reference unit.<br><br>454 diverse clinical specimens excluding abscesses.                                                           | 15.59 (6.28-38.68)<br><br>21.29 (7.04-64.4)                                                                | 0<br><br>0                                             |
| Issartel (29)    | France          | 2002    | Gaston Bourret hospital, New Caledonia | Patients admitted for drainage of community-onset soft tissue infections.                                                                                                       | 48/52 (92.3) CA-SA                                                                                                                              | No comparator                                                                                                                                                                   | No comparator data                                                                                         | N/A                                                    |
| Jappe (33)       | Germany         | 2003-05 | University of Heidelberg               | Patients attending outpatients with abscess or furuncle. Infection onset not specified.                                                                                         | 20/108 (18.5) SA                                                                                                                                | Patients with SSTI excluding abscess or furuncle.                                                                                                                               | 21.25 (6.38-70.82)                                                                                         |                                                        |
| Johnsson (52)    | Sweden          | 1999-02 | Orebro University hospital             | Patients attending hospital with SSTI. Community or hospital-onset not specified.                                                                                               | 17/146 (11.6) SA                                                                                                                                | 88 specimens from hospitalised patients with BSI or pneumonia.                                                                                                                  | 4.87 (1.38-17.17)                                                                                          | N/A                                                    |

<sup>1</sup> Prevalence of PVL-positive strains amongst *S. aureus* (SA), meticillin-resistant (MRSA) or meticillin-sensitive strains (MSSA)

<sup>2</sup> 95% confidence interval

<sup>3</sup> Comparator sample contained less than 50 isolates

|                                 |         |         |                                            |                                                                                                     |                                         |                                                                                              |                               |                                      |
|---------------------------------|---------|---------|--------------------------------------------|-----------------------------------------------------------------------------------------------------|-----------------------------------------|----------------------------------------------------------------------------------------------|-------------------------------|--------------------------------------|
| Kanerva (13)                    | Finland | 2004-06 | Reference laboratory, Helsinki             | 1) Community-acquired SSTI specimens submitted to reference unit                                    | 72/156 (46.2) CA-MRSA                   | Diverse clinical specimens submitted to reference unit, defined as community-acquired.       | 2.14 (0.96-4.76) <b>18</b>    | 33/90 (37%) ST8 MRSA-IV <sup>1</sup> |
|                                 |         |         |                                            | 2) Specimens from community-acquired abscesses submitted to reference unit.                         | 54/65 (83.1) MRSA                       | Community-acquired mixed clinical specimens submitted to reference lab, excluding abscesses. | 17.18 (7.94-37.20)            |                                      |
| Lina (18)                       | France  | 1985-98 | Reference unit                             | 1) Specimens from pyogenic infections submitted to reference unit. Infection onset not specified.   | 38/74 (51.4) SA                         | Diverse clinical specimens submitted to reference laboratory.                                | 2.92 (1.54-5.54)              | N/A                                  |
|                                 |         |         |                                            | 2) Specimens from abscess and furuncles submitted to reference unit. Infection onset not specified. | 28/30 (93.3) SA                         | Mixed clinical specimens submitted to reference laboratory, excluding furuncles.             | 41.2 (9.35-181.73)            |                                      |
| Masiuk (30)                     | Poland  | 2002-08 | Pomeranian University, Szczecin            | Patients with furunculosis attending hospital. Infection onset not specified.                       | 64/74 (86.5) SA                         | No comparator                                                                                | No comparator data            | N/A                                  |
| Maugat *(71)                    | France  | 2003    | Labville network of 69 laboratories        | SSTI isolates submitted to laboratory. Infection onset not specified.                               | 1/142 (0.7) MRSA                        | No comparator                                                                                | No comparator data            | 0                                    |
| Monecke (32)                    | Germany |         | University of Dresden                      | Consecutive SA isolates from skin infections. Infection onset not specified.                        | 30/100 (30.0) SA                        | No comparator                                                                                | No comparator data            | 1/3 (33) USA300 MRSA                 |
| Sdougkos (31)                   | Greece  | 2005-06 | Karamandaneion & Patras hospitals          | Hospitalised children with community-acquired SSTI.                                                 | 81/96 (84.4) CA-SA                      | No comparator                                                                                | No comparator data            | 0 MRSA                               |
| Shallcross *(53)                | England | 2007    | Royal Free Hospital, London                | SSTI isolates submitted to hospital laboratory. Infection onset not specified.                      | 22/106 (20.8) SA                        | Diverse clinical specimens submitted to hospital laboratory.                                 | 4.38 (2.20-8.73)              | N/A                                  |
| Vorobieva* (54)                 | Russia  | 2004    | Regional hospital in Arkhangelsk           | SSTI isolates submitted to hospital laboratory. Infection onset not specified.                      | 34/66 (51.5) SA                         | Diverse clinical specimens submitted to hospital laboratory.                                 | 3.36 (1.19-9.49) <sup>2</sup> | 0                                    |
| <b>United States of America</b> |         |         |                                            |                                                                                                     |                                         |                                                                                              |                               |                                      |
| Bhattacharya *(38)              | USA     | 2000-02 | San Francisco & Stanford Hospitals         | Randomly selected community-onset SSTI specimens from adults submitted to hospital laboratory.      | 91/277 (32.9) CO-MRSA                   | No comparator                                                                                | No comparator data            | 34/91 (37) USA300                    |
| Crum* (39)                      | USA     | 1990-04 | US military clinic and hospital, San Diego | Subset of SSTI submitted to laboratory. 62% community-onset SSTI.                                   | 93/134 (69.4) CA-MRSA; 0/85 (0) HA-MRSA | No comparator                                                                                | No comparator data            | 69/93 (74) ST8                       |

<sup>1</sup> Refers to entire study

\* Study of unselected isolates which included all *S. aureus* specimens submitted to laboratory

<sup>2</sup> Comparator sample contained less than 50 isolates

|                                    |           |         |                                                |                                                                                                                                |                                                                                 |                                                                                                    |                                 |                                                    |
|------------------------------------|-----------|---------|------------------------------------------------|--------------------------------------------------------------------------------------------------------------------------------|---------------------------------------------------------------------------------|----------------------------------------------------------------------------------------------------|---------------------------------|----------------------------------------------------|
| Davies (42)                        | USA       |         | Worldwide clinical trial                       | Part of clinical trial of patients with a complicated skin infection. Infection onset not specified.                           | 196/231 (84.8) MRSA                                                             | No comparator                                                                                      | No comparator data              | >95% USA300                                        |
| Faden (35)                         | USA       | 2006-8  | Buffalo hospital, New York                     | Specimens from children with abscesses requiring surgery.                                                                      | 59/60 (98.3) SA                                                                 | No comparator                                                                                      | No comparator                   | 57/59 (97) USA300                                  |
| Frazer (37)                        | USA       | 2003-04 | Alameda county medical centre, California      | Patients with SSTI attending the emergency department. 76% community-acquired SSTI.                                            | 80/85 (94.1) MRSA                                                               | No comparator                                                                                      | No comparator data              | 76/80 (95) ST8                                     |
| Gupta (40)                         | USA       | 2004-6  | Yale New Haven hospital                        | Patients with CA-MRSA defined on susceptibility to specified antibiotics.                                                      | 73/79 (92.4) CA-MRSA                                                            | No comparator                                                                                      | No comparator                   | Cannot calculate                                   |
| Jahamy (41)                        | USA       | 2005-06 | St. John hospital, Michigan                    | Specimens from patients admitted to hospital with soft tissue foci of infection. 74% community-acquired SSTI.                  | 82/99 (82.9) CA-MRSA; 3/44 (6.8) CA-MSSA; 11/33(33.3) HA-MRSA; 0/18 (0) HA-MSSA | Specimens from patients with soft tissue foci of infection excluding abscesses.                    | 7.46 (3.95-14.07)               | N/A                                                |
| Kaltsas (43)                       | USA       |         | Montefiore medical centre                      | Specimens from patients with SSTI. Infection onset not specified.                                                              | 37/58 (63.8) MSSA; 10/43 (23.3) MRSA                                            | Specimens from 99 patients with BSI.                                                               | 6.96 (3.32-14.58)               | 7/10 USA300 MRSA                                   |
| Moran (4)                          | USA       | 2004    | Emergency Departments in 11 cities             | Adults with purulent SSTIs of less than one week's duration attending the Emergency department. Infection onset not specified. | 213/218 (97.7)MRSA; 23/55 (41.8) MSSA                                           | No comparator                                                                                      | No comparator data              | 212/213 (100) USA300 MRSA; 17/17 (100) USA300 MSSA |
| Rajendran (36)                     | USA       | 2004-05 | ISIS clinic, San Francisco                     | Adults with a surgically drainable abscess. Infection onset not specified.                                                     | 80/86 (93.0) MRSA                                                               | No comparator                                                                                      | No comparator data              | N/A                                                |
| <b>Australia &amp; New Zealand</b> |           |         |                                                |                                                                                                                                |                                                                                 |                                                                                                    |                                 |                                                    |
| Costello (44)                      | Australia | 2008-09 | Queensland medical laboratory                  | Community-acquired SSTI specimens from adults, (defined as non-multi drug-resistant MRSA) submitted to hospital laboratory.    | 233/238 (97.9) CA-MRSA                                                          | No comparator                                                                                      | No comparator data              | 7/223 (3) USA300                                   |
| Gubbay (45)                        | Australia | 2001-02 | Westmead hospital Sydney                       | Specimens from children with Gentamicin -sensitive MRSA submitted to hospital laboratory. 98% community-acquired SSTI.         | 51/59 (86.4) CA-MRSA                                                            | No comparator                                                                                      | No comparator data              | 0                                                  |
| McDonald (72)                      | Australia | 2004-05 | 3 remote communities in the Northern territory | Patients with pyoderma resident in community.                                                                                  | 19/239 (7.9) CO-SA                                                              | No comparator                                                                                      | No comparator data              | N/A                                                |
| Munckhof (48)                      | Australia | 2004-05 | Eight hospitals in south-west Queensland       | Clinical isolates of non-multi-resistant MRSA, multi-resistant MRSA and MSSA SSTI submitted to                                 | 79/96 (82.3) CO-MRSA                                                            | 44 specimens from BSI and pulmonary infections submitted to hospital laboratory contemporaneously. | 9.96 (4.37-22.67) <sup>20</sup> | N/A                                                |

|                        |               |         |                                                              |  | hospital<br>Infection<br>specified.                                                                                                                                                     | laboratory.<br>onset not<br>isolates. |                                                                                      |                                                                                                                                                                                                              |                                                     |                                       |
|------------------------|---------------|---------|--------------------------------------------------------------|--|-----------------------------------------------------------------------------------------------------------------------------------------------------------------------------------------|---------------------------------------|--------------------------------------------------------------------------------------|--------------------------------------------------------------------------------------------------------------------------------------------------------------------------------------------------------------|-----------------------------------------------------|---------------------------------------|
| Muttaiyah (5)          | * New Zealand | 2008    | Auckland hospital                                            |  | Clinical Infection specified.                                                                                                                                                           | MSSA isolates. onset not specified.   | 112/234 (47.9) MSSA                                                                  | 101 specimens from diverse clinical isolates submitted to hospital laboratory.                                                                                                                               | 6.81 (3.54-13.11)                                   | N/A                                   |
| Nimmo (46)             | Australia     | 2008    | Hospitals in Queensland                                      |  | Community-onset non-multi resistant furunculosis isolates.                                                                                                                              |                                       | 115/117 (98.3) CO-MRSA                                                               | 182 diverse isolates (90% SSTI) from community-onset non-multi-resistant specimens submitted to laboratory contemporaneously.                                                                                | 40.00 (9.54-167.80)                                 | 2/207 (1) USA300 variant <sup>1</sup> |
| Tong (48)              | Australia     | 2006    | Royal Darwin hospital, Northern Territory                    |  | 1) SSTI specimens of non-multiresistant MRSA (nmMRSA) and MSSA<br>2) Abscess specimens of non-multiresistant MRSA (nmMRSA) and MSSA.                                                    |                                       | 121/212 (57.1) CO-MRSA; 89/207 (43.0)MSSA<br>64/72 (88.9) CO-MRSA; 46/57 (80.7) MSSA | 40 specimens of pneumonia and BSI submitted to laboratory contemporaneously.<br>349 Non-multiresistant MRSA (nmMRSA) and MSSA SSTI specimens submitted to laboratory contemporaneously, excluding abscesses. | 1.87 (0.95-3.67) <sup>2</sup><br>12.09 (7.07-20.67) | N/A                                   |
| <b>Asia and Africa</b> |               |         |                                                              |  |                                                                                                                                                                                         |                                       |                                                                                      |                                                                                                                                                                                                              |                                                     |                                       |
| Breurec (9)            | Africa        |         | 5 hospitals in Madagascar, Morocco, Niger, Senegal, Cameroon |  | Hospitalised patients with SSTI. Community or hospital-onset not specified.                                                                                                             |                                       | 67/119 (56.3) MSSA                                                                   | 109 diverse clinical specimens submitted to hospital laboratories contemporaneously.                                                                                                                         | 0.94 (0.56-1.59)                                    | Less than 5% ST8 <sup>3</sup>         |
| Cheung (49)            | Hong Kong     | 2006    | Hong Kong reference laboratory                               |  | CA-MRSA SSTI isolates submitted to laboratory.                                                                                                                                          |                                       | 37/83 (44.6) CA-MRSA                                                                 | 57 diverse specimens of CA-MRSA submitted to laboratory contemporaneously.                                                                                                                                   | 8.36 (3.03-23.07)                                   | 0                                     |
| Hsu (6)*               | Singapore     | 2004    | Singapore General Hospital                                   |  | SSTI specimens from adults submitted to hospital laboratory. Infection onset not stated.<br>Abscess specimens from adults submitted to hospital laboratory. Infection onset not stated. |                                       | 16/95 (17%) SA<br>14/34 (41.2) SA                                                    | 68 Diverse specimens from adults submitted contemporaneously to hospital laboratory.<br>129 diverse specimens from adults submitted contemporaneously to hospital laboratory, excluding abscesses.           | 4.39 (1.23-15.72)<br>17.36 (5.64-53.5)              | N/A                                   |
| Lo (50)                | Taiwan        | 2003-05 | Triservice hospital, Taipei                                  |  | SSTI specimens from hospitalised children submitted to laboratory. Infection onset not stated.                                                                                          |                                       | 54/67 (80.6) SA                                                                      | 72 diverse specimens from hospitalised children submitted to hospital laboratory.                                                                                                                            | 5.39 (2.62-11.12)                                   | N/A                                   |
| Mesrati *(57)          | Tunisia       | 2005-07 | Charles Nicolle hospital, Tunis                              |  | SSTI specimens submitted to hospital laboratory. Infection onset not stated.                                                                                                            |                                       | 11/54 (20.4) SA                                                                      | 89 diverse clinical specimens submitted to hospital laboratory.                                                                                                                                              | 0.88 (0.39-2.02)                                    | N/A                                   |

\* Study of unselected isolates which included all *S. aureus* specimens submitted to laboratory

<sup>1</sup> Refers to entire study, data unavailable for furunculosis

<sup>2</sup> Less than 50 comparator isolates

<sup>3</sup> Refers to entire study, data unavailable for SSTI alone

|                      |              |         |                            |                                                                                                                      |                                         |                                                                                                    |                    |                                               |
|----------------------|--------------|---------|----------------------------|----------------------------------------------------------------------------------------------------------------------|-----------------------------------------|----------------------------------------------------------------------------------------------------|--------------------|-----------------------------------------------|
| Nickerson (11)       | Thailand     | 2006-07 | Sappasithiprasong hospital | Specimens from abscesses and furuncles submitted to hospital laboratory. Infection onset not stated.                 | 11/20 (55.0) SA                         | 124 diverse clinical specimens submitted to hospital laboratory excluding abscesses and furuncles. | 7.15 (2.56-20.00)  |                                               |
|                      |              |         |                            | 1) Specimens from patients attending hospital with <i>S. aureus</i> SSTI. Community or hospital onset not specified. | 99/151 (65.6) SA                        | 97 diverse clinical specimens from patients attending hospital.                                    | 6.13 (3.44-10.90)  | N/A                                           |
|                      |              |         |                            | 2) Specimens from patients attending hospital with abscess. Infection onset not specified.                           | 91/123 (74.0) SA                        | 125 specimens from patients attending hospital with mixed clinical infections excluding abscess.   | 8.62 (4.87-15.28)  |                                               |
| Yao (51)             | China        | 2002-8  | Wenzhou hospital           | Pus samples from patients with community and hospital acquired SSTI                                                  | 13/63 (20.6) HA-SA; 13/48 (27.1) CA-SA  | No comparator                                                                                      | No comparator      | 0                                             |
| <b>Global Trials</b> |              |         |                            |                                                                                                                      |                                         |                                                                                                    |                    |                                               |
| Goering (73)         | 10 countries | 2004-05 | 5 global clinical trials   | Community-onset uncomplicated SSTI. Infection onset not specified.                                                   | 55/105 (52.4) MRSA; 118/187 (63.1) MSSA | No comparator                                                                                      | No comparator data | 49/55 (89) USA300 MRSA; 5/118 (4) USA300 MSSA |

**Table 5. Studies assessing the role of PVL genes in *S. aureus* colonisation**

| Author                     | Location    | Year    | Study setting                           | Inclusion criteria and provenance of carriage isolates                                                                            | Prevalence of PVL gene (%) amongst <i>S. aureus</i> <sup>1</sup> colonisation isolates | Comparator population of skin and soft tissue infection (SSTI) isolates | Odds of infection with PVL-positive strain comparing pneumonia to skin & soft tissue infection OR (95% CI) <sup>2</sup> | Proportion of PVL strains identified as ST8 / USA300 (%) |
|----------------------------|-------------|---------|-----------------------------------------|-----------------------------------------------------------------------------------------------------------------------------------|----------------------------------------------------------------------------------------|-------------------------------------------------------------------------|-------------------------------------------------------------------------------------------------------------------------|----------------------------------------------------------|
| <b>Comparative studies</b> |             |         |                                         |                                                                                                                                   |                                                                                        |                                                                         |                                                                                                                         |                                                          |
| Lo (50)                    | Taiwan      | 2003-05 | Triservice hospital, Taipei             | Nasal specimens from healthy children in the community.                                                                           | 18/300 (6.0) SA                                                                        | 67 SSTI specimens from hospitalised children submitted to laboratory.   | 0.02 (0.007-0.03)                                                                                                       | N/A                                                      |
| Masiuk (30)                | Poland      | 2002-08 | Pomeranian University, Szczecin         | Nasal specimens from healthy blood donors excluding those with skin infection in the prior 2 years.                               | 1/108 (0.9) SA                                                                         | 74 specimens from patients with furunculosis.                           | 0.001 (0.0002-0.01)                                                                                                     | 0                                                        |
| Melles (58)                | Netherlands |         | University Medical Centre, Rotterdam    | Nasal specimens from healthy children and healthy adults aged >55 years in Rotterdam area.                                        | 5/829 (0.6) MSSA                                                                       | 18 SSTI specimens from patients in Rotterdam area.                      | 0.01 (0.003-0.03) <sup>3</sup>                                                                                          | N/A                                                      |
| Muttaiah (5)               | New Zealand | 2008    | Auckland hospital                       | Nasal specimens from healthy volunteers in community with no hospital contact in the prior 3 months.                              | 29/93 (31.2) MSSA                                                                      | 234 SSTI specimens submitted to hospital laboratory.                    | 0.49 (0.30-0.82)                                                                                                        | 0                                                        |
| Schaumburg (74)            | Gabon       | 2008-10 | Lambarene region                        | Nostril, axilla and groin specimens from inpatients, outpatients, hospital personnel and participants without healthcare contact. | 66/163 (40.5) SA                                                                       | 21 specimens from abscesses and wounds submitted to Lambarene hospital. | 0.28 (0.12-0.64)                                                                                                        | 1/163 (0.6)                                              |
| Thomsen (63)               | USA         | 2003-8  | Vanderbilt hospital                     | Nasal specimens from children attending health maintenance visits.                                                                | 17/105 (16.2) SA                                                                       | 113 specimens from children with localised SSTI.                        | 0.03 (0.01-0.06)                                                                                                        | 0                                                        |
| Sdougkos (31)              | Greece      | 2005-06 | Karamandaneion & Patras hospitals       | Nasal swabs from healthy uninfected children attending outpatients.                                                               | 6/73 (8.2) SA                                                                          | Specimens from 96 hospitalised children with community-acquired SSTI.   | 0.02 (0.006-0.05)                                                                                                       | 0                                                        |
| <b>Prevalence studies</b>  |             |         |                                         |                                                                                                                                   |                                                                                        |                                                                         |                                                                                                                         |                                                          |
| Deurenberg (75)            | Indonesia   | 2006    | Yogyakarta area                         | Nasal specimens from patients attending outpatients and their companions attending with them.                                     | 10/62 (16.1) MSSA                                                                      | No comparator                                                           | No comparator                                                                                                           | 0                                                        |
| Fan (76)                   | China       | 2005    | Chengdu                                 | Nasal specimens from children attending kindergartens                                                                             | 33/147 (18.4) SA                                                                       | No SSTI comparator                                                      | No comparator                                                                                                           | 0                                                        |
| Ghasemzadeh Moghaddam (77) | Malaysia    | 2008    | Serdang                                 | Nasal specimens from healthy individuals who lack risk factors for healthcare contact.                                            | 9/110 (8.1) MSSA                                                                       | No comparator                                                           | No comparator                                                                                                           | N/A                                                      |
| Huang(64)                  | Taiwan      | 2005-6  | Linko, Kaohsiung and Taichung hospitals | Nasal specimens from healthy children aged less than 5 years attending a well-child health care visit.                            | 60/212 (28.3) MRSA                                                                     | No comparator                                                           | No comparator                                                                                                           | N/A                                                      |

\*Study of unselected isolates which included all *S. aureus* specimens submitted to laboratory

<sup>1</sup> Prevalence of PVL-positive strains amongst *S. aureus* (SA), methicillin-resistant (MRSA) or methicillin-sensitive strains (MSSA)

<sup>2</sup> Odds ratio and 95% confidence interval

<sup>3</sup> Comparator population contains fewer than 50 isolates

|               |           |        |                                             |                                                                                                                                                 |                                     |               |               |     |
|---------------|-----------|--------|---------------------------------------------|-------------------------------------------------------------------------------------------------------------------------------------------------|-------------------------------------|---------------|---------------|-----|
| Kuehnert (62) | USA       | 2001-2 | National Health & Nutrition Survey (NHANES) | Nasal swabs from US population participating in NHANES.                                                                                         | 3/297 (1.0) MSSA<br>6/75 (8.0) MRSA | No comparator | No comparator | N/A |
| Lee (78)      | Korea     | 2008   | Seoul                                       | Nasal specimens from healthy pre-school children attending daycare centres.                                                                     | 0/60 (0) SA                         | No comparator | No comparator | 0   |
| Lo (65)       | Taiwan    | 2004-6 | Triservice hospital                         | Nasal specimens from healthy children attending 57 kindergartens or a health maintenance visit.                                                 | 123/371 (33.2) MRSA                 | No comparator | No comparator | N/A |
| Lozano (59)   | Spain     | 2009   | La Rioja                                    | Nasal specimens from healthy volunteers who lacked risk factors for healthcare or animal contact.                                               | 0/53 (0) SA                         | No comparator | No comparator | 0   |
| Monecke (60)  | Germany   | 2005-8 | Saxony                                      | Nasal specimens from medical students, inpatients admitted for conditions unrelated to <i>S. aureus</i> and employees of a biomedical facility. | 1/155 (0.7)                         | No comparator | No comparator | 0   |
| Munckhof (79) | Australia | 2005-6 | Brisbane suburbs                            | Nasal specimens from patients attending General Practice without an infectious condition and healthy volunteers selected from electoral roll.   | 2/191 (1.0) SA                      | No comparator | No comparator | N/A |
| Neela (80)    | Malaysia  |        | Selangor                                    | Nasal specimens from Orang asli community and rural population.                                                                                 | 4/88 (4.5) MRSA                     | No comparator | No comparator | 0   |
| Peck (25)     | Korea     | 2006   | Seoul                                       | Nasal specimens from children attending outpatients.                                                                                            | 0/95 (0) SA                         | No comparator | No comparator | N/A |
| Severin (81)  | Indonesia | 2001-2 | Semarang and Surabaya                       | Nasal specimens from inpatients, patients attending primary care and healthy relatives.                                                         | 35/329 (10.6) SA                    | No comparator | No comparator | 0   |
| Wang (82)     | Taiwan    | 2007   | Taiwan hospital                             | Nasal specimens from adults attending mandatory health examinations as part of workplace health promotion.                                      | 2/119 (1.7) MRSA                    | No comparator | No comparator | N/A |



## Reference List

- 1 Gillet Y, Vanhems P, Lina G, et al. Factors predicting mortality in necrotizing community-acquired pneumonia caused by *Staphylococcus aureus* containing Pantone-Valentine leukocidin. *Clin Infect Dis* 2007; **45**: 315–21.
- 2 Geng W, Yang Y, Wu D, et al. Community-acquired, methicillin-resistant *Staphylococcus aureus* isolated from children with community-onset pneumonia in China. *Pediatr Pulmonol* 2010; **45**: 387–94.
- 3 Carrillo-Marquez MA, Hulten KG, Hammerman W, Lamberth L, Mason EO, Kaplan SL. *Staphylococcus aureus* pneumonia in children in the era of community-acquired methicillin-resistance at Texas Children's Hospital. *Pediatr Infect Dis J* 2011; **30**: 545–50.
- 4 Moran GJ, Krishnadasan A, Gorwitz RJ, et al. Methicillin-resistant *S. aureus* infections among patients in the emergency department. *N Engl J Med* 2006; **355**: 666–74.
- 5 Muttaiyah S, Coombs G, Pandey S, et al. Incidence, risk factors, and outcomes of Pantone-Valentine leukocidin-positive methicillin-susceptible *Staphylococcus aureus* infections in Auckland, New Zealand. *J Clin Microbiol* 2010; **48**: 3470–74.
- 6 Hsu L-Y, Koh T-H, Kurup A, Low J, Chlebicki MP, Tan B-H. High incidence of Pantone-Valentine leukocidin-producing *Staphylococcus aureus* in a tertiary care public hospital in Singapore. *Clin Infect Dis* 2005; **40**: 486–489.
- 7 Kechrid A, Perez-Vazquez M, Smaoui H, et al. Molecular analysis of community-acquired methicillin-susceptible and resistant *Staphylococcus aureus* isolates recovered from bacteraemic and osteomyelitis infections in children from Tunisia. *Clin Microbiol & Infect* 2011; **17**: 1020–26.
- 8 Abdel-Haq N, Al-Tatari H, Chearskul P, et al. Methicillin-resistant *Staphylococcus aureus* (MRSA) in hospitalized children: correlation of molecular analysis with clinical presentation and antibiotic susceptibility testing (ABST) results. *Eur J Clin Microbiol Infect Dis* 2009; **28**: 547–51.
- 9 Breurec S, Fall C, Pouillot R, et al. Epidemiology of methicillin-susceptible *Staphylococcus aureus* lineages in five major African towns: high prevalence of Pantone-Valentine leukocidin genes. *Clin Microbiol Infect* 2011; **173**: 633–39.
- 10 Dailiana ZH, Rigopoulos N, Varitimidis SE, Poultsides L, Petinaki E, Malizos KN. Clinical and epidemiological features of upper-extremity infections caused by *Staphylococcus aureus* carrying the PVL gene: a four-year study in Greece. *Med Sci Monit* 2008; **14**: CR511-CR514.
- 11 Nickerson EK, Wuthiekanun V, Wongsuvan G, et al. Factors predicting and reducing mortality in patients with invasive *Staphylococcus aureus* disease in a developing country. *PLoS ONE* 2009; **4**: 6512.
- 12 Wehrhahn MC, Robinson JO, Pearson JC, et al. Clinical and laboratory features of invasive community-onset methicillin-resistant *Staphylococcus aureus* infection: a prospective case-control study. *Eur J Clin Microbiol Infect Dis* 2010; **29**: 1025–33.
- 13 Kanerva M, Salmenlinna S, Vuopio-Varkila J, et al. Community-associated methicillin-resistant *Staphylococcus aureus* isolated in Finland in 2004 to 2006. *J Clin Microbiol* 2009; **47**: 2655–57.
- 14 Lina G, Piemont Y, Godail-Gamot F, Bes M, Peter MO, Gauduchon V, et al. Involvement of Pantone-Valentine leukocidin-producing *Staphylococcus aureus* in primary skin infections and pneumonia. *Clin Infect Dis* 1999; **29**: 1128–32.
- 15 Dohin B, Gillet Y, Kohler R, et al. Pediatric bone and joint infections caused by pantone-valentine leukocidin-positive *Staphylococcus aureus*. *Pediatr Infect Dis J* 2007; **26**: 1042–1048.

- 16 Pannaraj PS, Hulten KG, Gonzalez BE, Mason EO, Jr., Kaplan SL. Infective pyomyositis and myositis in children in the era of community-acquired, methicillin-resistant *Staphylococcus aureus* infection. *Clin Infect Dis* 2006; **43**: 953–60.
- 17 Martinez-Aguilar G, Avalos-Mishaan A, Hulten K, Hammerman W, Mason J, Kaplan SL. Community-acquired, methicillin-resistant and methicillin-susceptible *Staphylococcus aureus* musculoskeletal infections in children. *Pediatr Infect Dis J* 2004; **23**: 701–706.
- 18 Badiou C, Dumitrescu O, George N, et al. Rapid detection of *Staphylococcus aureus* Panton-Valentine leukocidin in clinical specimens by enzyme-linked immunosorbent assay and immunochromatographic tests. *J Clin Microbiol* 2010; **48**: 1384–90.
- 19 Perez-Vazquez M, Vindel A, Marcos C, Oteo J, Cuevas O, Trincado P, et al. Spread of invasive Spanish *Staphylococcus aureus* spa-type t067 associated with a high prevalence of the aminoglycoside-modifying enzyme gene *ant(4')-Ia* and the efflux pump genes *msrA/msrB*. *J Antimicrob Chemother* 2009; **63**: 21–31.
- 20 Seybold U, Kourbatova EV, Johnson JG, et al. Emergence of community-associated methicillin-resistant *Staphylococcus aureus* USA300 genotype as a major cause of health care-associated blood stream infections. *Clin Infect Dis* 2006; **42**: 647–56.
- 21 Chua T, Moore CL, Perri MB, et al. Molecular epidemiology of methicillin-resistant *Staphylococcus aureus* bloodstream isolates in urban Detroit. *J Clin Microbiol* 2008; **46**: 2345–52.
- 22 Chen SY, Wang JL, Chen TH, et al. Differences between methicillin-resistant *Staphylococcus aureus* bacteremic isolates harboring type IV and type V staphylococcal cassette chromosome *mec* genes based on prior patient healthcare exposure. *Eur J Clin Microbiol Infect Dis* 2010; **29**: 1539–46.
- 23 Wang J-L, Wang J-T, Chen S-Y, et al. Adult methicillin-resistant *Staphylococcus aureus* bacteremia in Taiwan: clinical significance of non-multi-resistant antibiogram and Panton-Valentine leukocidin gene. *Diagn Microbiol Infect Dis* 2007; **59**: 365–371.
- 24 Huang YH, Tseng SP, Hu JM, Tsai JC, Hsueh PR, Teng LJ. Clonal spread of SCCmec type IV methicillin-resistant *Staphylococcus aureus* between community and hospital. *Clin Microbiol Infect* 2007; **13**: 717–724.
- 25 Peck KR, Baek JY, Song JH, Ko KS. Comparison of genotypes and enterotoxin genes between *Staphylococcus aureus* isolates from blood and nasal colonizers in a Korean hospital. *J Korean Med Sci* 2009; **24**: 585–91.
- 26 D'Souza N, Rodrigues C, Mehta A. Molecular characterization of methicillin-resistant *Staphylococcus aureus* with emergence of epidemic clones of sequence type (ST) 22 and ST 772 in Mumbai, India. *J Clin Microbiol* 2010; **48**: 1806–11.
- 27 Del Giudice P, Bes M, Hubiche T, et al. Panton-valentine leukocidin-positive *Staphylococcus aureus* strains are associated with follicular skin infections. *Dermatology* 2011; **222**: 167–170.
- 28 Del Giudice P, Blanc V, De Rougemont A, et al. Primary skin abscesses are mainly caused by panton-valentine leukocidin-positive *staphylococcus aureus* strains. *Dermatology* 2009; **219**: 299–302.
- 29 Issartel B, Tristan A, Lechevallier S, et al. Frequent carriage of Panton-Valentine leucocidin genes by *Staphylococcus aureus* isolates from surgically drained abscesses. *J Clin Microbiol* 2005; **43**: 3203–07.
- 30 Masiuk H, Kopron K, Grumann D, et al. Association of recurrent furunculosis with Panton-Valentine leukocidin and the genetic background of *Staphylococcus aureus*. *J Clin Microbiol* 2010; **48**: 1527–35.
- 31 Sdougkos G, Chini V, Papanastasiou DA, et al. Community-associated *Staphylococcus aureus* infections and nasal carriage among children: molecular microbial data and clinical characteristics. *Clin Microbiol Infect* 2008; **14**: 995–1001.

- 32 Monecke S, Slickers P, Ellington MJ, Kearns AM, Ehricht R. High diversity of Pantone-Valentine leukocidin-positive, methicillin-susceptible isolates of *Staphylococcus aureus* and implications for the evolution of community-associated methicillin-resistant *S. aureus*. *Clin Microbiol Infect* 2007; **13**: 1157–1164.
- 33 Jappe U, Heuck D, Strommenger B, et al. *Staphylococcus aureus* in dermatology outpatients with special emphasis on community-associated methicillin-resistant strains. *J Invest Dermatol* 2008; **128**: 2655–64.
- 34 Otter JA, Havill NL, Boyce JM, French GL. Comparison of community-associated methicillin-resistant *Staphylococcus aureus* from teaching hospitals in London and the USA, 2004–2006: where is USA300 in the UK? *Eur J Clin Microbiol Infect Dis* 2009; **28**: 835–39.
- 35 Faden H, Lesse AJ, Trask J, et al. Importance of colonization site in the current epidemic of staphylococcal skin abscesses. *Pediatrics* 2010; **125**: e618–e624.
- 36 Rajendran PM, Young D, Maurer T, et al. Randomized, double-blind, placebo-controlled trial of cephalexin for treatment of uncomplicated skin abscesses in a population at risk for community-acquired methicillin-resistant *Staphylococcus aureus* infection. *Antimicrob Agents Chemother* 2007; **51**: 4044–48.
- 37 Frazee BW, Lynn J, Charlebois ED, Lambert L, Lowery D, Perdreau-Remington F. High prevalence of methicillin-resistant *Staphylococcus aureus* in emergency department skin and soft tissue infections. *Ann Emerg Med* 2005; **45**: 311–320.
- 38 Bhattacharya D, Carleton H, Tsai CJ, Baron EJ, Perdreau-Remington F. Differences in clinical and molecular characteristics of skin and soft tissue methicillin-resistant *Staphylococcus aureus* isolates between two hospitals in Northern California. *J Clin Microbiol* 2007; **45**: 1798–803.
- 39 Crum NF, Lee RU, Thornton SA, et al. Fifteen-year study of the changing epidemiology of methicillin-resistant *Staphylococcus aureus*. *Am J Med* 2006; **119**: 943–51.
- 40 Gupta K, MacIntyre A, Vanasse G, Dembry LM. Trends in prescribing beta-lactam antibiotics for treatment of community-associated methicillin-resistant *Staphylococcus aureus* infections. *J Clin Microbiol* 2007; **45**: 3930–34.
- 41 Jahamy H, Ganga R, Al Raiy B, et al. *Staphylococcus aureus* skin/soft-tissue infections: The impact of SCCmec type and Pantone-Valentine leukocidin. *Scand J Infect Dis* 2008; **40**: 601–606.
- 42 Davies TA, Shang W, Amsler KM, Bajaksouzian S, Jacobs MR, Bush K. Molecular characterisation of methicillin-resistant *Staphylococcus aureus* isolates from two ceftobiprole Phase 3 complicated skin and skin-structure infection clinical trials. *Int J Antimicrob Agents* 2009; **34**: 166–168.
- 43 Kaltsas A, Guh A, Mediavilla JR, Varshney AK, Robiou N, Gialanellia P, et al. Frequency of pantone-valentine leukocidin-producing methicillin-sensitive *Staphylococcus* strains in patients with complicated skin and soft tissue infection in Bronx, New York. *J Clin Microbiol* 2011; **49**: 2992–95.
- 44 Costello ME, Huygens F. Diversity of community acquired MRSA carrying the PVL gene in Queensland and New South Wales, Australia. *Eur J Clin Microbiol Infect Dis* 2011; **30**: 1163–67.
- 45 Gubbay JB, Gosbell IB, Barbagiannakos T, Vickery AM, Mercer JL, Watson M. Clinical features, epidemiology, antimicrobial resistance, and exotoxin genes (including that of Pantone-Valentine leukocidin) of gentamicin-susceptible methicillin-resistant *Staphylococcus aureus* (GS-MRSA) isolated at a paediatric teaching hospital in New South Wales, Australia. *Pathology* 2008; **40**: 64–71.
- 46 Nimmo GR, Schooneveldt JM, Sutherland JL, et al. Epidemiology of non-multiresistant methicillin-resistant *Staphylococcus aureus* infection in Queensland, Australia: associations with indigenous populations and Pantone-Valentine leukocidin. *Eur J Clin Microbiol Infect Dis* 2010; **29**: 1253–59.

- 47 Tong SYC, Lilliebridge RA, Bishop EJ, et al. Clinical correlates of panton-valentine leukocidin (PVL), PVL isoforms, and clonal complex in the staphylococcus aureus population of Northern Australia. *J Infect Dis* 2010; **202**: 760–769.
- 48 Munckhof WJ, Nimmo GR, Carney J, et al. Methicillin-susceptible, non-multiresistant methicillin-resistant and multiresistant methicillin-resistant *Staphylococcus aureus* infections: a clinical, epidemiological and microbiological comparative study. *Eur J Clin Microbiol Infect Dis* 2008; **27**: 355–64.
- 49 Cheung TKM, Chu YW, Chu MY, Tsang VYM, Lo JYC. Panton-valentine leukocidin-positive methicillin-resistant *Staphylococcus aureus* in the community in Hong Kong. *J Med Microbiol* 2008; **57**: 1440–1443.
- 50 Lo WT, Lin WJ, Tseng MH, Wang SR, Chu ML, Wang CC. Methicillin-resistant *Staphylococcus aureus* in children, Taiwan. *Emerg Infect Dis* 2006; **12**: 1267–70.
- 51 Yao D, Yu FY, Qin ZQ, et al. Molecular characterization of *Staphylococcus aureus* isolates causing skin and soft tissue infections (SSTIs). *BMC Infect Dis* 2010; **10**: 133.
- 52 Johnsson D, Molling P, Stralin K, Soderquist B. Detection of Panton-Valentine leukocidin gene in *Staphylococcus aureus* by LightCycler PCR: clinical and epidemiological aspects. *Clin Microbiol Infect* 2004; **10**: 884–89.
- 53 Shallcross LJ, Williams K, Hopkins S, Aldridge RW, Johnson AM, Hayward AC. Panton-Valentine leukocidin associated staphylococcal disease: a cross-sectional study at a London hospital, England. *Clin Microbiol Infect* 2010; **16**: 1644–48.
- 54 Vorobieva V, Bazhukova T, Hanssen AM, et al. Clinical isolates of *Staphylococcus aureus* from the Arkhangelsk region, Russia: Antimicrobial susceptibility, molecular epidemiology, and distribution of Panton-Valentine leukocidin genes. *APMIS* 2008; **116**: 877–887.
- 55 Couppie P, Cribier B, Prevost G. Leukocidin from *Staphylococcus aureus* and cutaneous infections: an epidemiologic study. *Arch Dermatol* 1994; **130**: 1208–9.
- 56 Holmes A, Ganner M, McGuane S, Pitt TL, Cookson BD, Kearns AM. *Staphylococcus aureus* isolates carrying Panton-Valentine leukocidin genes in England and Wales: frequency, characterization, and association with clinical disease. *J Clin Microbiol* 2005; **43**: 2384–90.
- 57 Mesrati I, Saidani M, Ennigrou S, Zouari B, Ben RS. Clinical isolates of Panton-Valentine leukocidin- and gamma-haemolysin-producing *Staphylococcus aureus*: prevalence and association with clinical infections. *J Hosp Infect* 2010; **75**: 265–68.
- 58 Melles DC, van Leeuwen WB, Boelens HA, Peeters JK, Verbrugh HA, van Belkum A. Panton-Valentine leukocidin genes in *Staphylococcus aureus*. *Emerg Infect Dis* 2006; **12**: 1174–75.
- 59 Lozano C, Gomez-Sanz E, Benito D, Aspiroz C, Zarazaga M, Torres C. *Staphylococcus aureus* nasal carriage, virulence traits, antibiotic resistance mechanisms, and genetic lineages in healthy humans in Spain, with detection of CC398 and CC97 strains. *Int J Med Microbiol* 2011; **301**: 500–5.
- 60 Monecke S, Luedicke C, Slickers P, Ehrlich R. Molecular epidemiology of *Staphylococcus aureus* in asymptomatic carriers. *Eur J Clin Microbiol Infect Dis* 2009; **28**: 1159–65.
- 61 Chini V, Petinaki E, Foka A, Paratiras S, Dimitracopoulos G, Spiliopoulou I. Spread of *Staphylococcus aureus* clinical isolates carrying Panton-Valentine leukocidin genes during a 3-year period in Greece. *Clin Microbiol Infect* 2006; **12**: 29–34.
- 62 Kuehnert MJ, Kruszon-Moran D, Hill HA, et al. Prevalence of *Staphylococcus aureus* nasal colonization in the United States, 2001–2002. *J Infect Dis* 2006; **193**: 172–79.

- 63 Thomsen I, McKenna BD, Saye EJ, Jimenez N, Edwards KM, Creech CB. Molecular distinctions exist between community-associated methicillin-resistant *Staphylococcus aureus* colonization and disease-associated isolates in children. *Pediatr Infect Dis J* 2011; **30**: 418–21.
- 64 Huang YC, Hwang KP, Chen PY, Chen CJ, Lin TY. Prevalence of methicillin-resistant *Staphylococcus aureus* nasal colonization among Taiwanese children in 2005 and 2006. *J Clin Microbiol* 2007; **45**: 3992–95.
- 65 Lo WT, Wang CC, Lin WJ, et al. Changes in the nasal colonization with methicillin-resistant *Staphylococcus aureus* in children: 2004–2009. *PLoS One* 2010; **5**: e15791.
- 66 Peyrani P, Allen M, Wiemken TL, et al. Severity of disease and clinical outcomes in patients with hospital-acquired pneumonia due to methicillin-resistant *Staphylococcus aureus* strains not influenced by the presence of the panton-valentine leukocidin gene. *Clin Infect Dis* 2011; **53**: 766–771.
- 67 Ellington MJ, Hope R, Ganner M, East C, Brick G, Kearns AM. Is panton-valentine leucocidin associated with the pathogenesis of *Staphylococcus aureus* bacteraemia in the UK? *J Antimicrob Chemother* 2007; **60**: 402–405.
- 68 Mee-Marquet N, Domelier AS, Girard N, Quentin R. Epidemiology and typing of *Staphylococcus aureus* strains isolated from bloodstream infections. *J Clin Microbiol* 2004; **42**: 5650–57.
- 69 Rossney AS, Shore AC, Morgan PM, Fitzgibbon MM, O'Connell B, Coleman DC. The emergence and importation of diverse genotypes of methicillin-resistant *Staphylococcus aureus* (MRSA) harboring the Pantone-Valentine leukocidin gene (*pvl*) reveal that *pvl* is a poor marker for community-acquired MRSA strains in Ireland. *J Clin Microbiol* 2007; **45**: 2554–63.
- 70 von Eiff C, Friedrich AW, Peters G, Becker K. Prevalence of genes encoding for members of the staphylococcal leukotoxin family among clinical isolates of *Staphylococcus aureus*. *Diagn Microbiol Infect Dis* 2004; **49**: 157–62.
- 71 Maugat S, De Rougemont A, Aubry-Damon H, et al. Methicillin-resistant *Staphylococcus aureus* among a network of French private-sector community-based-medical laboratories. *Med Mal Infect* 2009; **39**: 311–8.
- 72 McDonald M, Dougall A, Holt D, et al. Use of a single-nucleotide polymorphism genotyping system to demonstrate the unique epidemiology of methicillin-resistant *Staphylococcus aureus* in remote aboriginal communities. *J Clin Microbiol* 2006; **44**: 3720–27.
- 73 Goering RV, Shawar RM, Scangarella NE, et al. Molecular epidemiology of methicillin-resistant and methicillin-susceptible *Staphylococcus aureus* isolates from global clinical trials. *J Clin Microbiol* 2008; **46**: 2842–47.
- 74 Schaumburg F, Ngoa UA, Kusters K, et al. Virulence factors and genotypes of *Staphylococcus aureus* from infection and carriage in Gabon. *Clin Microbiol Infect* 2011; **17**: 1507–13.
- 75 Deurenberg RH, Beisser PS, Visschers MJ, Driessen C, Stobberingh EE. Molecular typing of methicillin-susceptible *Staphylococcus aureus* isolates collected in the Yogyakarta area in Indonesia, 2006. *Clin Microbiol Infect* 2010; **16**: 92–94.
- 76 Fan J, Shu M, Zhang G, et al. Biogeography and virulence of *Staphylococcus aureus*. *PLoS One* 2009; **4**: e6216.
- 77 Ghasemzadeh-Moghaddam H, Ghaznavi-Rad E, Sekawi Z, et al. Methicillin-susceptible *Staphylococcus aureus* from clinical and community sources are genetically diverse. *Int J Med Microbiol* 2011; **301**: 347–53.
- 78 Lee J, Sung JY, Kim YM, et al. Molecular characterization of methicillin-resistant *Staphylococcus aureus* obtained from the anterior nares of healthy Korean children attending daycare centers. *Int J Infect Dis* 2011; **15**: e558–e563.

- 79 Munckhof WJ, Nimmo GR, Schooneveldt JM, et al. Nasal carriage of *Staphylococcus aureus*, including community-associated methicillin-resistant strains, in Queensland adults. *Clin Microbiol Infect* 2009; **15**: 149–55.
- 80 Neela V, Ehsanollah GR, Zambari S, van BA, Mariana NS. Prevalence of Panton-Valentine leukocidin genes among carriage and invasive *Staphylococcus aureus* isolates in Malaysia. *Int J Infect Dis* 2009; **13**: e131–e132.
- 81 Severin JA, Lestari ES, Kuntaman K, et al. Unusually high prevalence of panton-valentine leukocidin genes among methicillin-sensitive *Staphylococcus aureus* strains carried in the Indonesian population. *J Clin Microbiol* 2008; **46**: 1989–95.
- 82 Wang JT, Liao CH, Fang CT, et al. Prevalence of and risk factors for colonization by methicillin-resistant *Staphylococcus aureus* among adults in community settings in Taiwan. *J Clin Microbiol* 2009; **47**: 2957–63.
